# Supplementary material for: Water-mediated kinetic engineering of CTF QDs for emerging solar cells
Source: Royal Society of Chemistry journal article supplement (doi:10.1039/d5sc08329j), 2025-12-18
Supplement: d5sc08329j1.pdf [file d5sc08329j1.pdf]

## Supporting information

### Water-mediated kinetic engineering of CTF QDs for emerging solar cells

Manying Liu,<sup>\*, a</sup> Zikang Lei,<sup>a</sup> Peiyuan Ma,<sup>a</sup> Lixin Feng,<sup>a</sup> Yuanhao Wang,<sup>a</sup> Dandan Zhao,<sup>a</sup> Yanru Guo,<sup>a</sup> Yange Zhang,<sup>a</sup> Xin Zhao,<sup>\*, b</sup> and Zhi Zheng<sup>\*, a</sup>

<sup>a</sup>Key Laboratory of Micro-Nano Materials for Energy Storage and Conversion of Henan Province, Institute of Surface Micro and Nano Materials, College of Chemical and Materials Engineering, Xuchang University, Henan 461000, China.

E-mail: manyingliu988@xcu.edu.cn, zzheng@xcu.edu.cn

<sup>b</sup>State Key Laboratory of Organometallic Chemistry, Shanghai Institute of Organic Chemistry, Chinese Academy of Sciences, Shanghai 200032, China.

E-mail: xzhao@sioc.ac.cn

**Keywords:** covalent triazine frameworks, quantum dots, kinetics, interfacial modifier, solar cells

## Section 1 Materials, Characterizations, and Methods

**Materials:** All chemical reagents were employed as received without additional purification. Anhydrous dimethyl sulfoxide (DMSO), benzene-1,4-dicarbonitrile, N,N-dimethylformamide (DMF, anhydrous grade), terephthalaldehyde, potassium tert-butoxide, and 2,5-thiophenedicarboxaldehyde were procured from Shanghai Adamas Reagent Co., Ltd. Terephthalamidine was synthesized in-house following established protocols.<sup>1</sup> Fluorine-doped tin oxide (FTO) conductive glass substrates ( $1.5 \times 1.5 \text{ cm}^2$ ,  $8 \text{ } \Omega/\text{sq}$ ) were acquired from Shanghai Zaofu New Materials Co., Ltd. High-purity cesium bromide (CsBr, 99.99%) and lead bromide ( $\text{PbBr}_2$ , 99.9%) were sourced from Macklin Biochemical Co., Ltd.

**Synthetic procedures of CTF QDs:** Taking CTF-QD-1 as an example, the synthesis process is described below. First, 0.1632 g (1.0 mmol) of terephthalamidine was dissolved in 3 mL of deionized water and heated to  $50^\circ\text{C}$  with stirring until fully dissolved. Then, this terephthalamidine solution, along with 0.0675 g (0.5 mmol) of terephthalaldehyde and 0.1683 g (1.1 mmol) of potassium tert-butoxide, were added to a 50 mL round-bottom flask. Following this, 10 mL of DMF was introduced, and the mixture was thoroughly shaken to ensure homogeneity. The reaction proceeded in a microwave reactor (1500 W, 50%) for 55 minutes, resulting in the CTF-QD-1 solution. After completion, the mixture was cooled, washed with dilute hydrochloric acid, and centrifuged at 10000 rpm. Finally, the product was freeze-dried to yield 0.0566 g of a light-yellow powder, corresponding to a yield of 27.6%. CTF-QD-2 was synthesized using an identical procedure, substituting 0.0700 g (0.5 mmol) of 2,5-thiophenedicarboxaldehyde for the terephthalaldehyde, resulting in a yield of 28.4%.

**Synthesis of  $\text{SnO}_2$  QDs:**  $\text{SnO}_2$  quantum dots were prepared by dissolving 1.015 g of  $\text{SnCl}_2 \cdot 2\text{H}_2\text{O}$  and 0.335 g of  $\text{CH}_4\text{N}_2\text{S}$  in 30 mL of deionized water in an uncovered beaker. The resulting slightly opaque, pale-yellow mixture was continuously stirred magnetically at room temperature for 36 hours. Following stirring, the mixture was

centrifuged at 9000 rpm for 5 minutes and filtered through a 0.22  $\mu\text{m}$  PTFE membrane to yield a transparent yellow solution of  $\text{SnO}_2$  quantum dots.

**Fabrication of Carbon-Based  $\text{CsPbBr}_3$  Perovskite Solar Cells (PSCs):** Pristine  $\text{CsPbBr}_3$  PSCs were fabricated following a reference methodology.<sup>2</sup> FTO substrates underwent sequential cleaning with detergent, acetone, isopropanol, ethanol, and DI water, followed by UV-ozone treatment for 30 minutes to ensure surface decontamination. A  $\text{SnO}_2$  quantum dot electron transport layer (ETL) was uniformly spin-coated (2000 rpm, 30 s) onto the FTO substrate and thermally cured at 200°C for 1 hour under ambient conditions. A preheated (80°C) 1 M  $\text{PbBr}_2$  solution in DMF was then spin-coated (2000 rpm, 30 s) onto the FTO/ETL substrate and annealed at 90°C for 30 minutes. This process was followed by spin-deposition (2000 rpm, 30 s) of a 0.07 M  $\text{CsBr}$  methanol solution onto the  $\text{PbBr}_2$  layer, which was then sintered at 250°C for 5 minutes. This sequential coating and annealing cycle were repeated 9 times to achieve the desired perovskite film. The device fabrication concluded with blade-coating a carbon electrode onto the FTO/ETL/ $\text{CsPbBr}_3$  stack.

**For  $\text{CsPbBr}_3$ @CTF-QD-1 PSCs,** the protocol was modified by integrating CTF-QD-1 films at varying concentrations (1.0, 2.0, and 3.0 mg/L) into the  $\text{PbBr}_2$  precursor solution prior to deposition. All other procedural parameters remained unchanged.

**Characterizations:** The chemical structure of CTF QDs was characterized using Fourier-transform infrared (FT-IR) spectroscopy (Bruker Vertex 70), X-ray photoelectron spectroscopy (XPS) on an Axis Ultra DLD 600 W instrument (Shimadzu, Japan), and  $^{13}\text{C}$  cross-polarization magic-angle spinning nuclear magnetic resonance ( $^{13}\text{C}$  CP/MAS NMR, 400 MHz WB Bruker Avance II). The porous characteristics of CTF QDs were investigated with a surface area and porosity analyzer (Micromeritics ASAP 2020 M), where pore size distribution was determined through non-local density functional theory (NLDFT) modeling using  $\text{N}_2$  adsorption-desorption isotherms. The crystallinity of CTF QDs and  $\text{CsPbBr}_3$  was analyzed by X-ray diffraction (XRD, Philips X'Pert Pro) with

Cu K $\alpha$  radiation ( $\lambda = 1.5418 \text{ \AA}$ ). Morphological features of CTF QDs were investigated through field-emission scanning electron microscopy (FE-SEM, FEI Sirion 200) and transmission electron microscopy (TEM, Tecnai G2 F30, FEI Holland). UV-vis-NIR absorption spectra were acquired using a Cary 5000 spectrophotometer (Varian). Steady-state photoluminescence (PL) and time-resolved photoluminescence (TRPL) measurements were performed with a fluorescence spectrophotometer (excitation wavelength: 465 nm). Transient surface photovoltage (TSPV) signals were recorded under 355 nm pulsed laser excitation. Current density-voltage ( $J$ - $V$ ) characteristics were evaluated under ambient conditions using a solar simulator with AM 1.5G illumination ( $100 \text{ mW/cm}^2$ ).

## Section 2 Fig. S1-S16 and Tables S1-S4

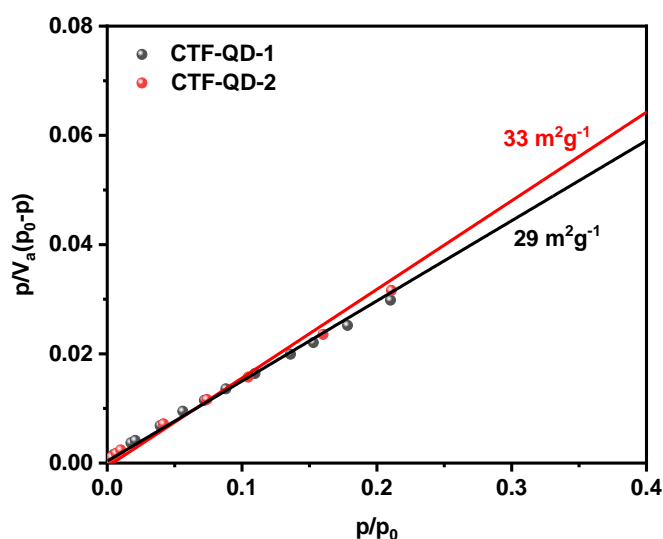

**Fig. S1** Brunauer-Emmett-Teller (BET) analysis plots of CTF-QDs.

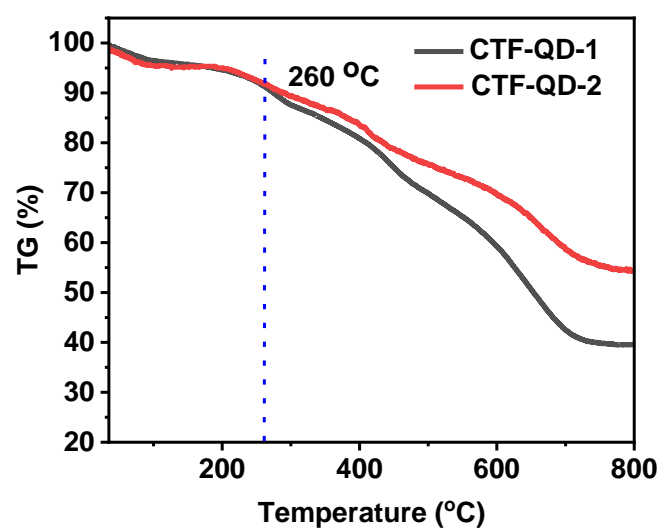

**Fig. S2** Thermogravimetric (TG) analysis of CTF-QDs

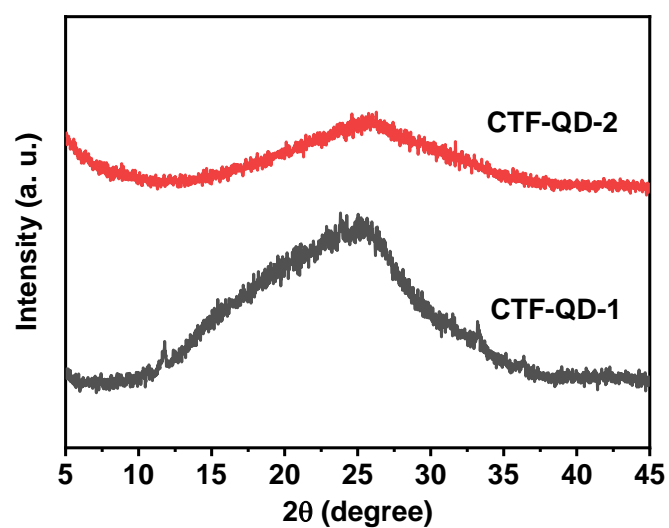

**Fig. S3** XRD patterns of CTF-QD-1 and CTF-QD-2

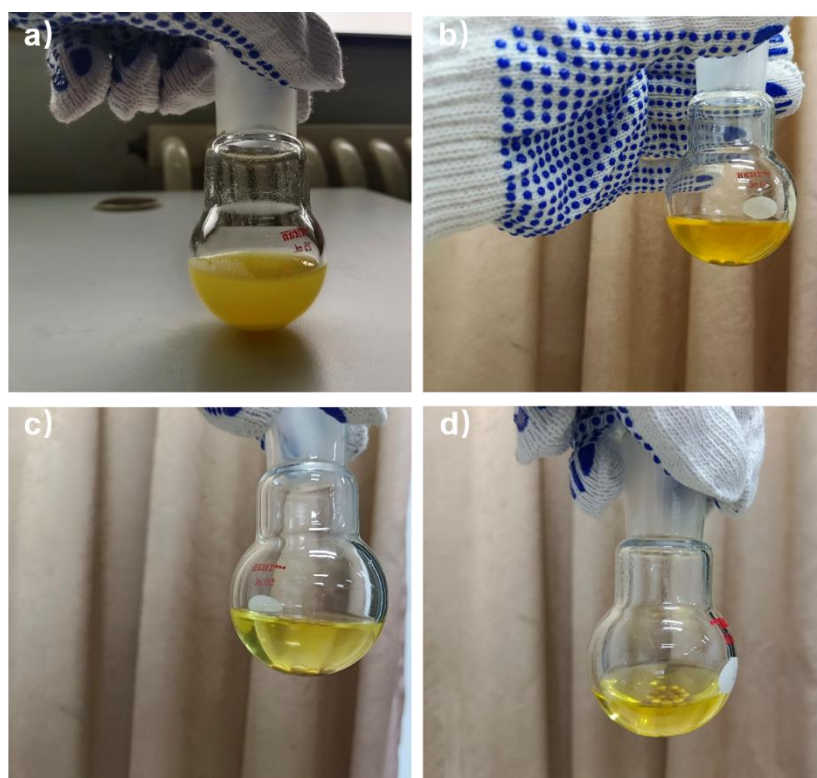

**Fig. S4** Digital photos of CTF-QD-1 with different amounts of water added during the polymerization reaction: (a) 1 mL, (b) 2 mL, (c) 3 mL, and (d) 4 mL.

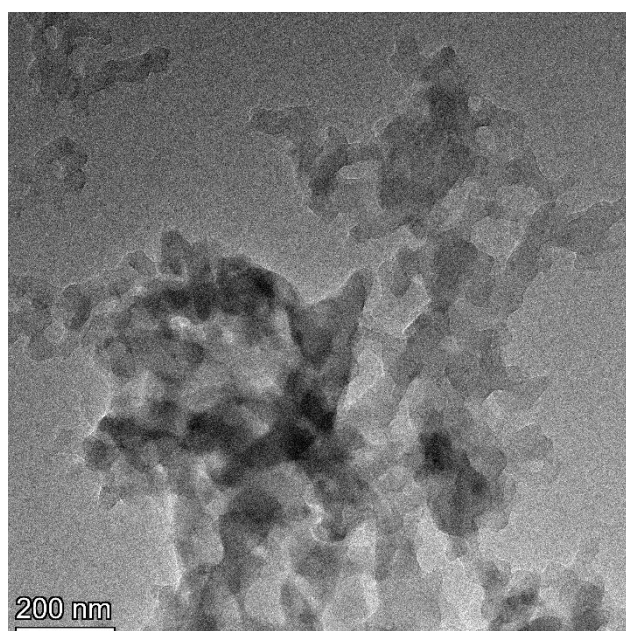

**Fig. S5** TEM image of CTF-QD-1 obtained upon the addition of 0 mL water.

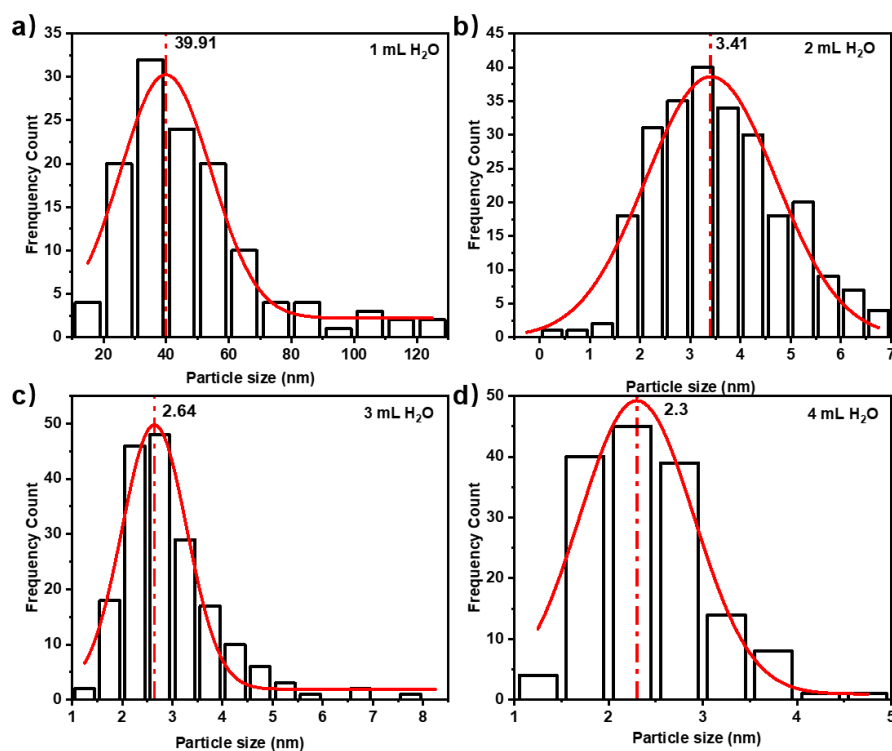

**Fig. S6** Particle size distributions characterized through statistical analysis of high-resolution TEM micrographs using ImageJ software with the addition of (a) 1 mL, (b) 2 mL, (c) 3 mL, and (d) 4 mL water.

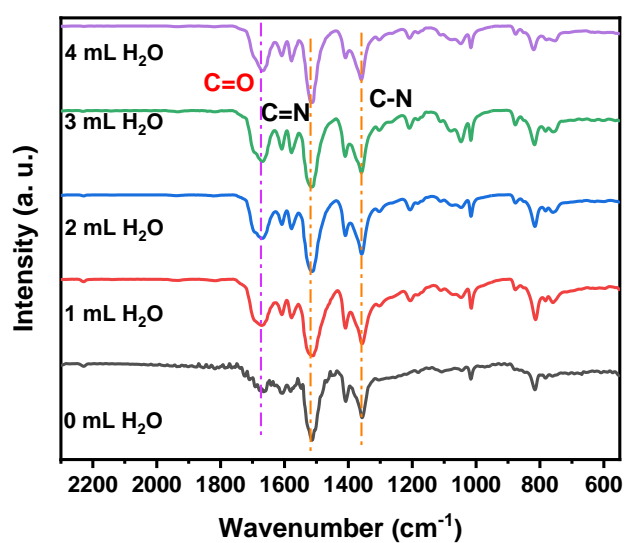

**Fig. S7** Normalized FT-IR Spectra for CTF-QD-1 with varying water dosages.

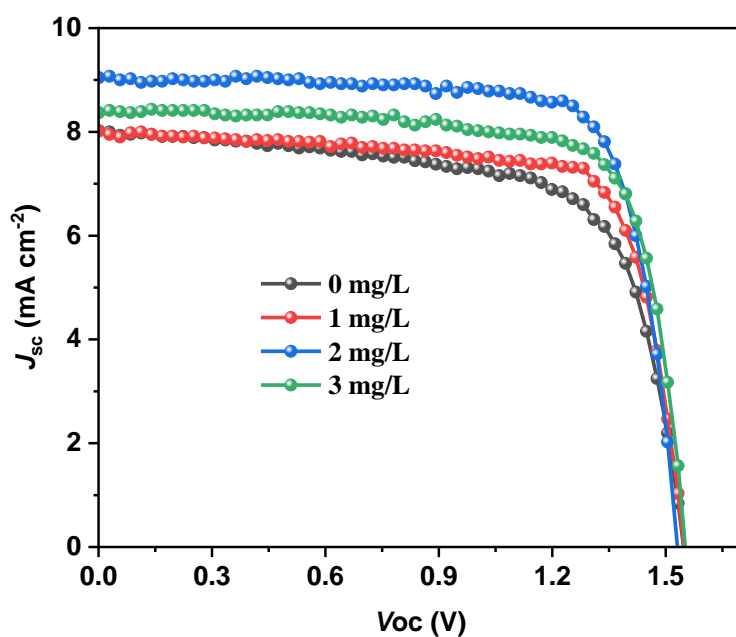

**Fig. S8**  $J$ - $V$  curves of  $\text{CsPbBr}_3$  PSCs with different CTF-QD-1 concentrations.

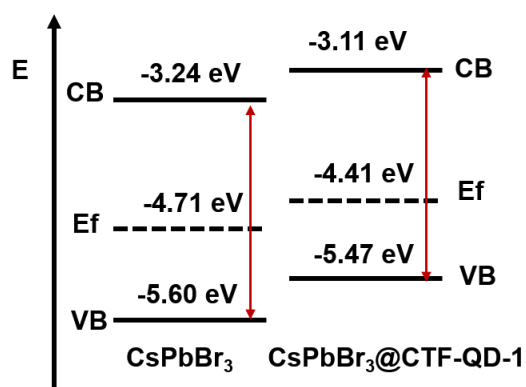

**Fig. S9** Schematic of energy level diagram of  $\text{CsPbBr}_3$  and  $\text{CsPbBr}_3$ @CTF-QD-1.



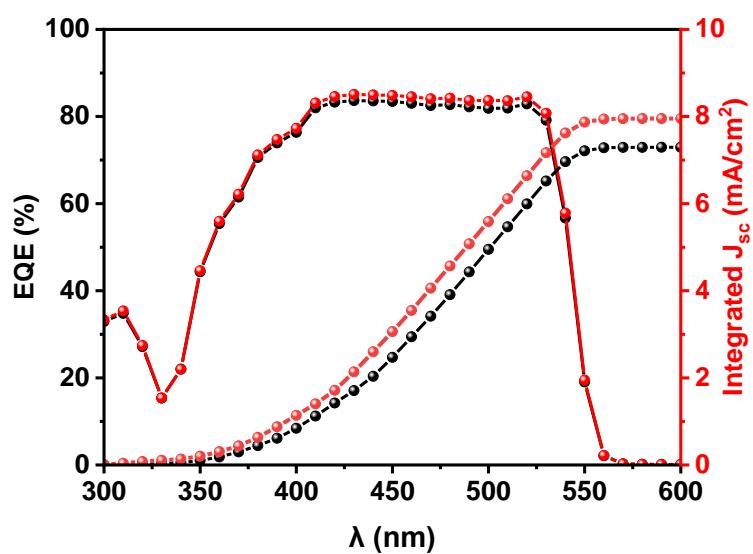

**Fig. S10** EQE curves of CsPbBr<sub>3</sub> (black) and CsPbBr<sub>3</sub>@CTF-QD-1 (red) PSCs.

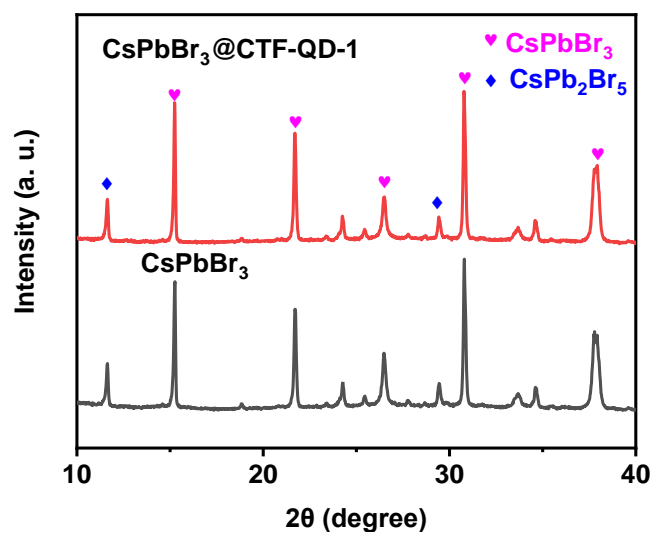

**Fig. S11** XRD patterns of CsPbBr<sub>3</sub> and CsPbBr<sub>3</sub>@CTF-QD-1.

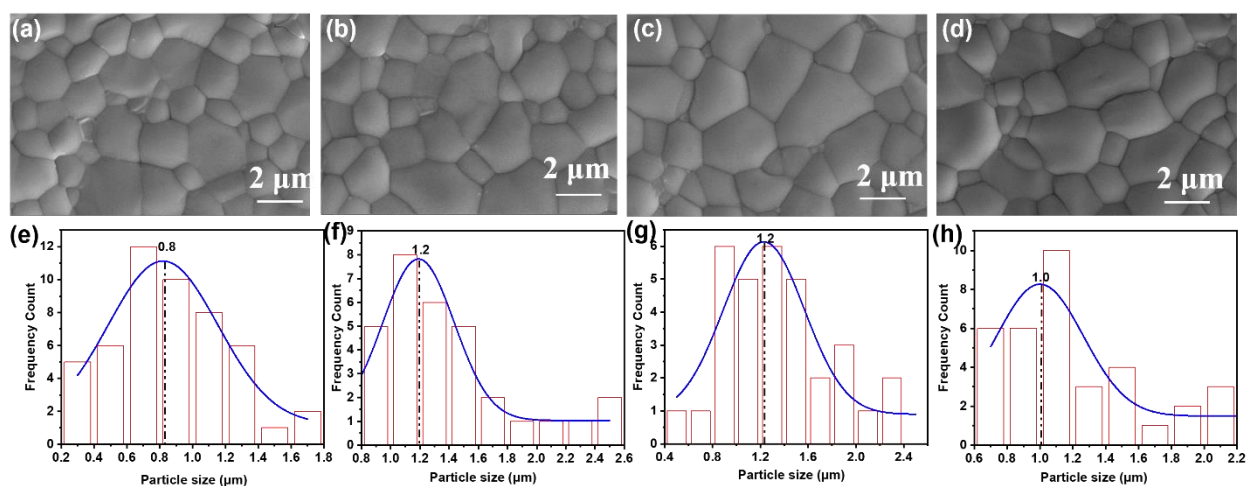

**Fig. S12** SEM images and particle size distribution statistical analyses of CsPbBr<sub>3</sub> with the addition of CTF-QD-1 are shown for the following concentrations: (a) and (e) 0 mg/L, (b) and (f) 1.0 mg/L, (c) and (g) 2.0 mg/L, and (d) and (h) 3.0 mg/L, respectively.

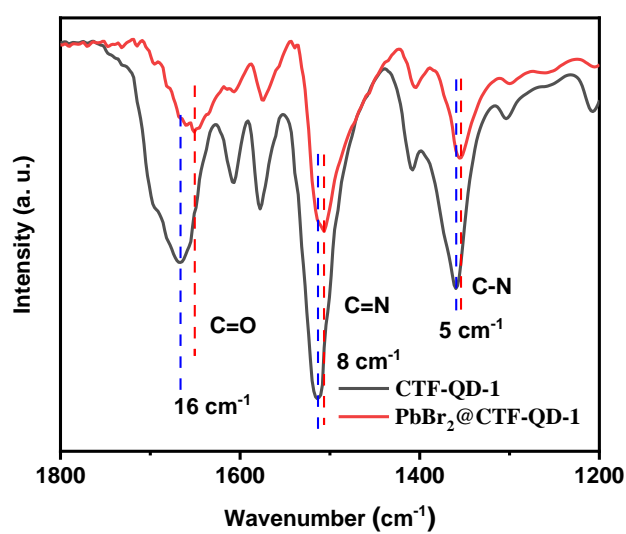

**Fig. S13** FT-IR spectra of CTF-QD-1 and PbBr<sub>2</sub>@CTF-QD-1.

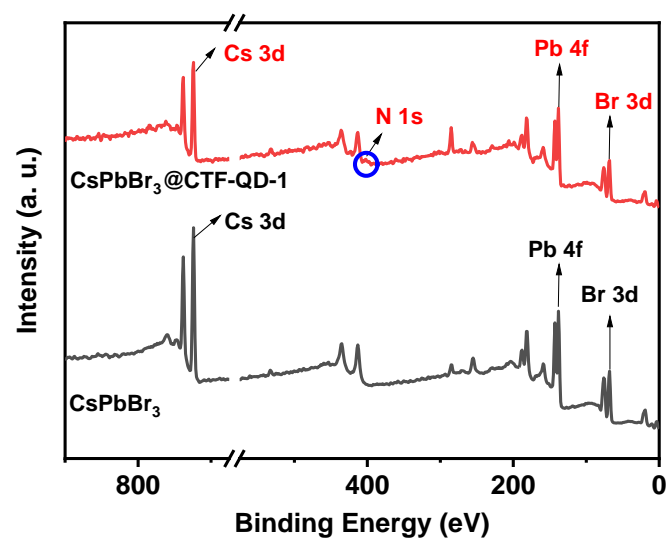

**Fig. S14** XPS survey spectra of CsPbBr<sub>3</sub> and CsPbBr<sub>3</sub>@CTF-QD-1.

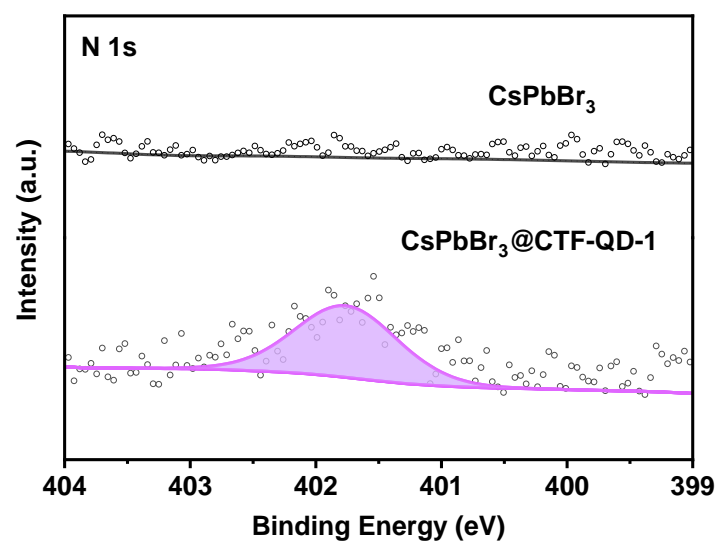

**Fig. S15** XPS spectra of N 1s core level of CsPbBr<sub>3</sub> and CsPbBr<sub>3</sub>@CTF-QD-1.

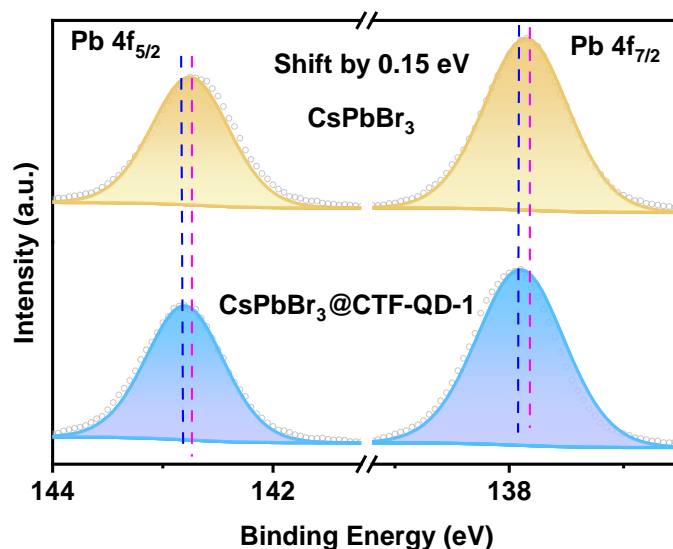

**Fig. S16** XPS spectra of Pb 3d core level of CsPbBr<sub>3</sub> and CsPbBr<sub>3</sub>@CTF-QD-1.

**Table S1** Element analysis of CTF-QDs.

| Sample   | N (Wt%) | C (Wt%) | H (Wt%) | S (Wt%) | O (Wt%) |
|----------|---------|---------|---------|---------|---------|
| CTF-QD-1 | 12.14   | 58.88   | 6.08    | 0.00    | 22.90   |
| CTF-QD-2 | 12.96   | 53.73   | 3.78    | 7.54    | 21.99   |

**Table S2** Photovoltaic parameters of CsPbBr<sub>3</sub> PSCs with different CTF-QD-1 concentrations.

| Concentration of CTF-QD-1 | V <sub>oc</sub> /(V) | J <sub>sc</sub> /(mA/cm <sup>2</sup> ) | FF/(%) | PCE/(%) |
|---------------------------|----------------------|----------------------------------------|--------|---------|
| 0mg/L                     | 1.55                 | 7.96                                   | 68.30  | 8.40    |
| 1 mg/L                    | 1.55                 | 7.97                                   | 75.30  | 9.27    |
| 2 mg/L                    | 1.56                 | 9.49                                   | 74.57  | 11.01   |
| 3 mg/L                    | 1.55                 | 8.39                                   | 75.90  | 9.87    |

**Table S3** TSPV parameters of CsPbBr<sub>3</sub> and CsPbBr<sub>3</sub>@ECTF-1 films.

| Sample                        | T <sub>t</sub> (s)    | T <sub>r</sub> (s)    | L                     |
|-------------------------------|-----------------------|-----------------------|-----------------------|
| CsPbBr <sub>3</sub>           | 7.12×10 <sup>-7</sup> | 2.27×10 <sup>-5</sup> | 3.14×10 <sup>-2</sup> |
| CsPbBr <sub>3</sub> @CTF-QD-1 | 7.12×10 <sup>-7</sup> | 6.14×10 <sup>-5</sup> | 1.16×10 <sup>-2</sup> |

Table S4 Photovoltaic parameters comparison of state-of-the-art CsPbBr<sub>3</sub> perovskite solar cells.

| PSCs                                                                                                                                                                                   | PCE (%) | J <sub>sc</sub> (mA<br>cm <sup>2</sup> ) | V <sub>oc</sub> (V) | FF<br>(%) | Ref.            |
|----------------------------------------------------------------------------------------------------------------------------------------------------------------------------------------|---------|------------------------------------------|---------------------|-----------|-----------------|
| FTO/SnO <sub>2</sub> /CsPbBr <sub>3</sub> @CTF-QD-1/Carbon                                                                                                                             | 11.01   | 9.49                                     | 1.560               | 74.57     | This<br>work    |
| FTO/SnO <sub>2</sub> -TiO <sub>x</sub> Cl <sub>4-2x</sub> /CsPbBr <sub>3</sub> +Ti <sub>3</sub> C <sub>2</sub> Cl <sub>x</sub> /Ti <sub>3</sub> C <sub>2</sub> Cl <sub>x</sub> /Carbon | 11.08   | 7.87                                     | 1.702               | 82.7      | a <sup>3</sup>  |
| FTO/c-TiO <sub>2</sub> /m-TiO <sub>2</sub> /CsPbBr <sub>3</sub> /CuInS <sub>2</sub> /ZnS<br>QDs/LPP-Carbon                                                                             | 10.85   | 7.73                                     | 1.626               | 86.3      | b <sup>4</sup>  |
| FTO/TiO <sub>2</sub> /DTPT/CsPbBr <sub>3</sub> /DTPT/Carbon                                                                                                                            | 11.21   | 8.52                                     | 1.574               | 83.67     | c <sup>5</sup>  |
| FTO/c-TiO <sub>2</sub> /m-TiO <sub>2</sub> /CsPbBr <sub>3</sub> /DCC/Carbon                                                                                                            | 10.16   | 7.79                                     | 1.611               | 80.96     | d <sup>6</sup>  |
| FTO/c-TiO <sub>2</sub> /m-TiO <sub>2</sub> /CsPbBr <sub>3</sub> /(WS <sub>2</sub> /AgIn <sub>5</sub> S <sub>8</sub> )<br>QDs HTM/Carbon                                                | 10.24   | 7.49                                     | 1.627               | 84.03     | e <sup>7</sup>  |
| FTO/c-TiO <sub>2</sub> /m-TiO <sub>2</sub> /CsPbBr <sub>3</sub> /VO@CNF                                                                                                                | 8.80    | 8.86                                     | 1.289               | 77.0      | f <sup>8</sup>  |
| FTO/c-TiO <sub>2</sub> /m-TiO <sub>2</sub> /Sm <sup>3+</sup> -CsPbBr <sub>3</sub> /<br>Cu(Cr,Ba)O <sub>2</sub> /Carbon                                                                 | 10.79   | 7.81                                     | 1.615               | 85.5      | g <sup>9</sup>  |
| FTO/c-TiO <sub>2</sub> /PTI-CsPbBr <sub>3</sub> /spiro-OMeTAD/Ag                                                                                                                       | 10.91   | 9.78                                     | 1.498               | 74.47     | h <sup>10</sup> |
| FTO/c-TiO <sub>2</sub> /CsPbBr <sub>3</sub> /Carbon                                                                                                                                    | 9.35    | 7.37                                     | 1.545               | 82.2      | i <sup>11</sup> |
| FTO/c-TiO <sub>2</sub> /m-TiO <sub>2</sub> /<br>CsPb <sub>0.97</sub> Tb <sub>0.03</sub> Br <sub>3</sub> /SnS:ZnS/NiO <sub>x</sub> /carbon                                              | 10.26   | 8.21                                     | 1.57                | 79.6      | j <sup>12</sup> |
| FTO/SnO <sub>2</sub> /CsPbBr <sub>3</sub> /N-CQDs/Carbon                                                                                                                               | 10.71   | 7.87                                     | 1.622               | 80.1      | k <sup>13</sup> |
| FTO/SnO <sub>2</sub> /CsPbBr <sub>3</sub> /CsSnBr <sub>2</sub> /Carbon                                                                                                                 | 10.60   | 7.80                                     | 1.610               | 84.4      | l <sup>14</sup> |
| FTO/SnO <sub>2</sub> -TiO <sub>x</sub> Cl <sub>4-2x</sub> /WS <sub>2</sub> /CsPbBr <sub>3</sub> /Carbon                                                                                | 10.65   | 7.95                                     | 1.70                | 79        | m <sup>15</sup> |
| FTO/c-TiO <sub>2</sub> /m-TiO <sub>2</sub> /Sm <sup>3+</sup> -CsPbBr <sub>3</sub> /Carbon                                                                                              | 10.14   | 7.48                                     | 1.594               | 85.1      | n <sup>16</sup> |
| FTO/SnO <sub>2</sub> /CsPbBr <sub>3</sub> -DPPP/Carbon                                                                                                                                 | 11.23   | 7.88                                     | 1.707               | 83.48     | o <sup>17</sup> |

## References

1. M. Liu, Q. Huang, S. Wang, Z. Li, B. Li, S. Jin and B. Tan, *Angew. Chem. Int. Ed.*, 2018, **57**,

11968-11972.

2. Y. He, Z. Li, M. Liu, S. Liu, J. Fu, Y. Zhang, Q. Li, Y. Tong and Z. Zheng, *Dalton Transactions*, 2023, **52**, 17308-17314.
3. Q. Zhou, J. Duan, J. Du, Q. Guo, Q. Zhang, X. Yang, Y. Duan and Q. Tang, *Adv. Sci.*, 2021, **8**, 2101418.
4. J. Duan, Y. Wang, X. Yang and Q. Tang, *Angew. Chem. Int. Ed.*, 2020, **59**, 4391-4395.
5. R. Guo, J. Xia, H. Gu, X. Chu, Y. Zhao, X. Meng, Z. Wu, J. Li, Y. Duan, Z. Li, Z. Wen, S. Chen, Y. Cai, C. Liang, Y. Shen, G. Xing, W. Zhang and G. Shao, *J. Mater. Chem. A*, 2023, **11**, 408-418.
6. J. Zhu, Y. Liu, B. He, W. Zhang, L. Cui, S. Wang, H. Chen, Y. Duan and Q. Tang, *Chem. Eng. J.*, 2022, **428**, 131950.
7. H. Sui, B. He, J. Ti, S. Sun, W. Jiao, H. Chen, Y. Duan, P. Yang and Q. Tang, *Chem. Eng. J.*, 2023, **455**, 140728.
8. X. Wang, Y. Gao, J. Guo and M. Wu, *Carbon*, 2024, **230**, 119566.
9. J. Duan, Y. Zhao, Y. Wang, X. Yang and Q. Tang, *Angew. Chem. Int. Ed.*, 2019, **58**, 16147-16151.
10. G. Tong, T. Chen, H. Li, L. Qiu, Z. Liu, Y. Dang, W. Song, L. K. Ono, Y. Jiang and Y. Qi, *Nano Energy*, 2019, **65**, 104015.
11. T. Xiang, Y. Zhang, H. Wu, J. Li, L. Yang, K. Wang, J. Xia, Z. Deng, J. Xiao, W. Li, Z. Ku, F. Huang, J. Zhong, Y. Peng and Y.-B. Cheng, *Sol. Energy Mater. Sol. Cells*, 2020, **206**, 110317.
12. H. Yuan, Y. Zhao, J. Duan, Y. Wang, X. Yang and Q. Tang, *J. Mater. Chem. A*, 2018, **6**, 24324-24329.
13. Y. Zhao, J. Duan, Y. Wang, X. Yang and Q. Tang, *Nano Energy*, 2020, **67**, 104286.
14. Y. Zhao, J. Duan, H. Yuan, Y. Wang, X. Yang, B. He and Q. Tang, *Solar RRL*, 2019, **3**, 1800284.

15. Q. Zhou, J. Duan, X. Yang, Y. Duan and Q. Tang, *Angew. Chem. Int. Ed.*, 2020, **59**, 21997-22001.
16. J. Duan, Y. Zhao, X. Yang, Y. Wang, B. He and Q. Tang, *Adv. Energy Mater.*, 2018, **8**, 1802346.
17. Y. Teng, Y. Zhao, Z. Xin, L. Bian, Q. Guo, J. Duan, J. Dou, Y. Zhang, Q. Zhang and Q. Tang, *J. Mater. Chem. A*, 2025, **13**, 21493-21500.
